# Supplementary material for: Photoluminescence properties of self-assembled chitosan-based composites containing semiconductor nanocrystals
Source: Royal Society of Chemistry journal article supplement (doi:10.1039/c8cp07051b), 2019-01-01
Supplement: c8cp07051b1.pdf [file c8cp07051b1.pdf]

## Supplementary Information

### Photoluminescent Properties of Self-Assembled Chitosan-Based Composites Containing Semiconductor Nanocrystals

Nina Slyusarenko<sup>a</sup>, Marina Gerasimova<sup>a</sup>, Alexei Plotnikov<sup>b</sup>, Nikolai Gaponik<sup>c</sup>  
and Evgenia Slyusareva<sup>a</sup>

<sup>a</sup>Siberian Federal University, Svobodny Prospect 79, 660041 Krasnoyarsk, Russia

<sup>b</sup>Freiberger Compound Materials GmbH, Am Junger-Löwe-Schacht 5, 09599 Freiberg, Germany

<sup>c</sup>Technische Universität Dresden, 01062 Dresden, Germany

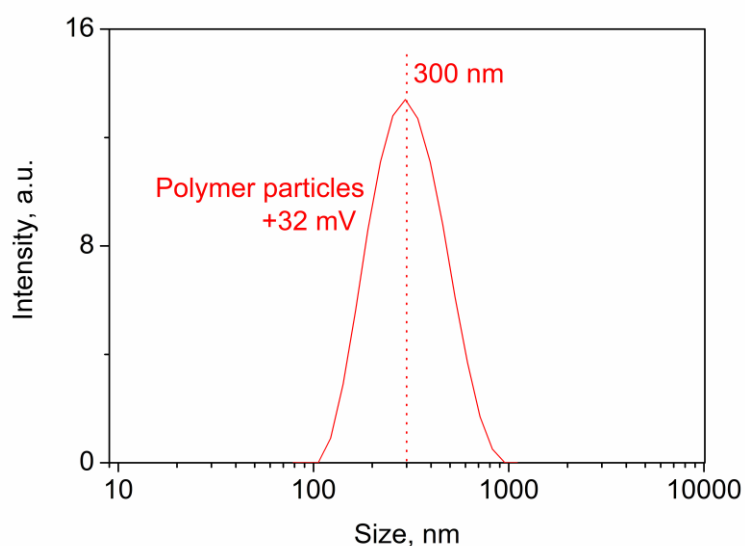

**Figure S1.**  $\zeta$ -potential and size distribution of polymer molecules and polymer particles.

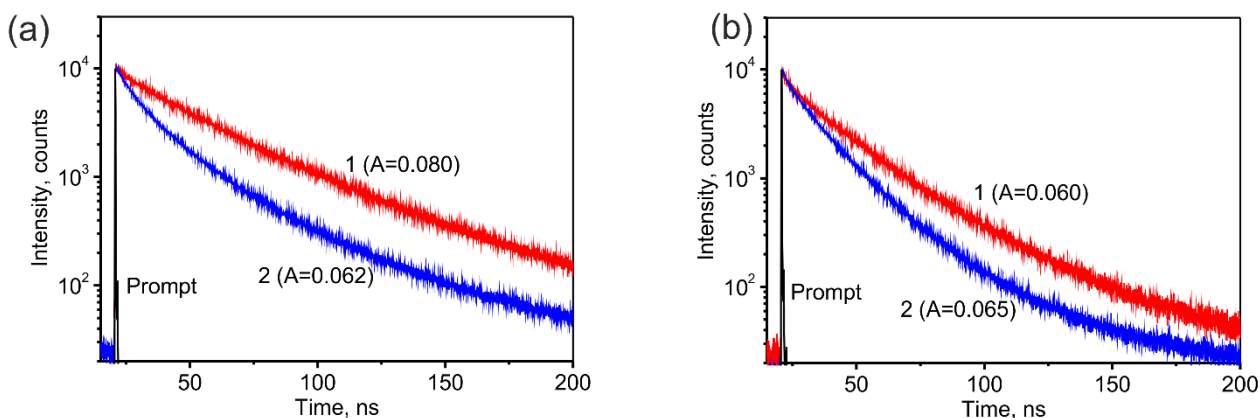

**Figure S2.** Time-resolved PL decays of (a) CdTe and (b) CdSe/ZnS dispersed in water (1) and embedded in polymer particles (2).

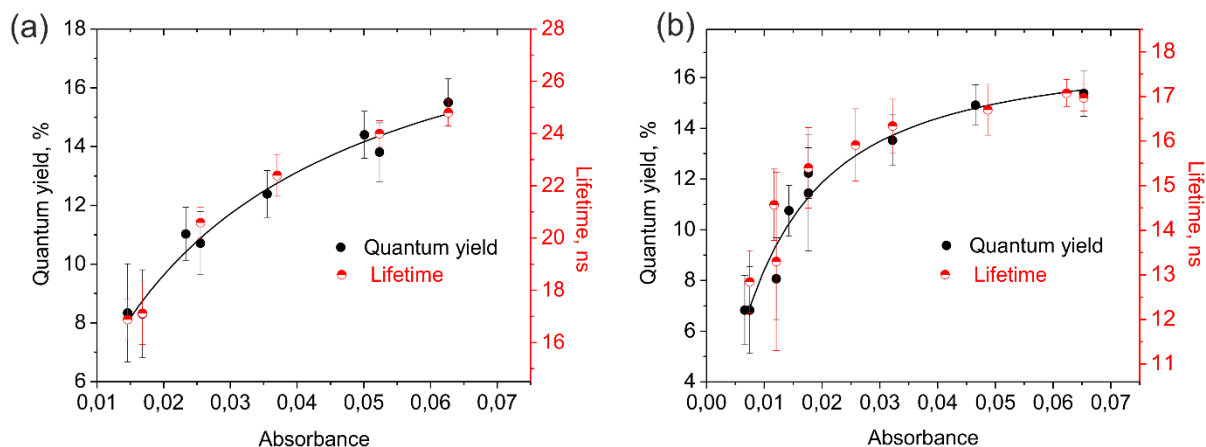

**Figure S3.** The PL quantum yields and lifetimes of (a) CdTe- and (b) CdSe/ZnS-containing particles.

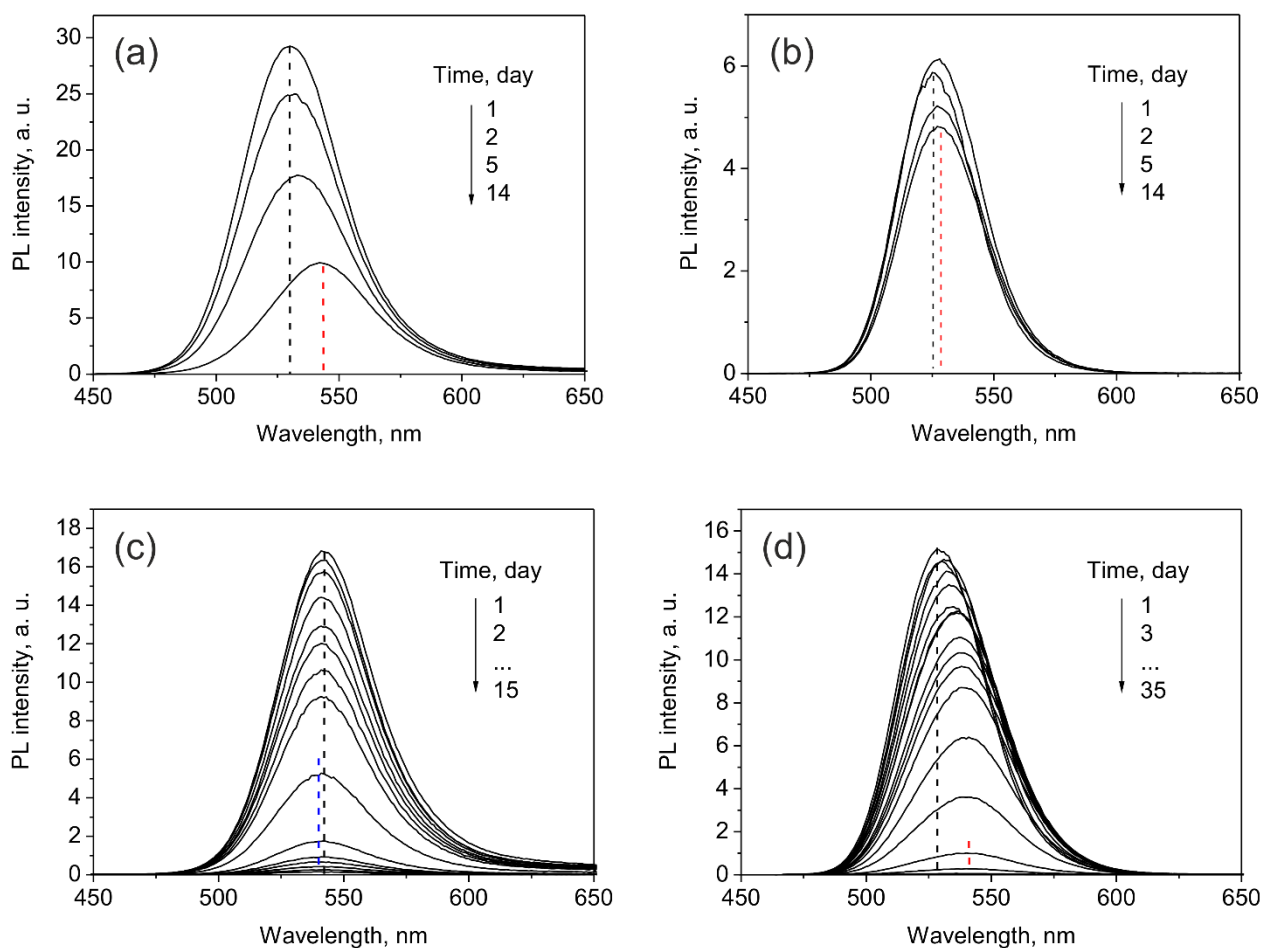

**Figure S4.** The temporal evolution of PL spectra of water dispersed (a) CdTe ( $A=0.023$ ), (b) CdSe/ZnS ( $A=0.011$ ) and (c) CdTe ( $A=0.052$ ), (d) CdSe/ZnS ( $A=0.065$ ) NCs-containing particles. Color dashed lines show the variation range of the position of spectral maximum (blue and red shift).

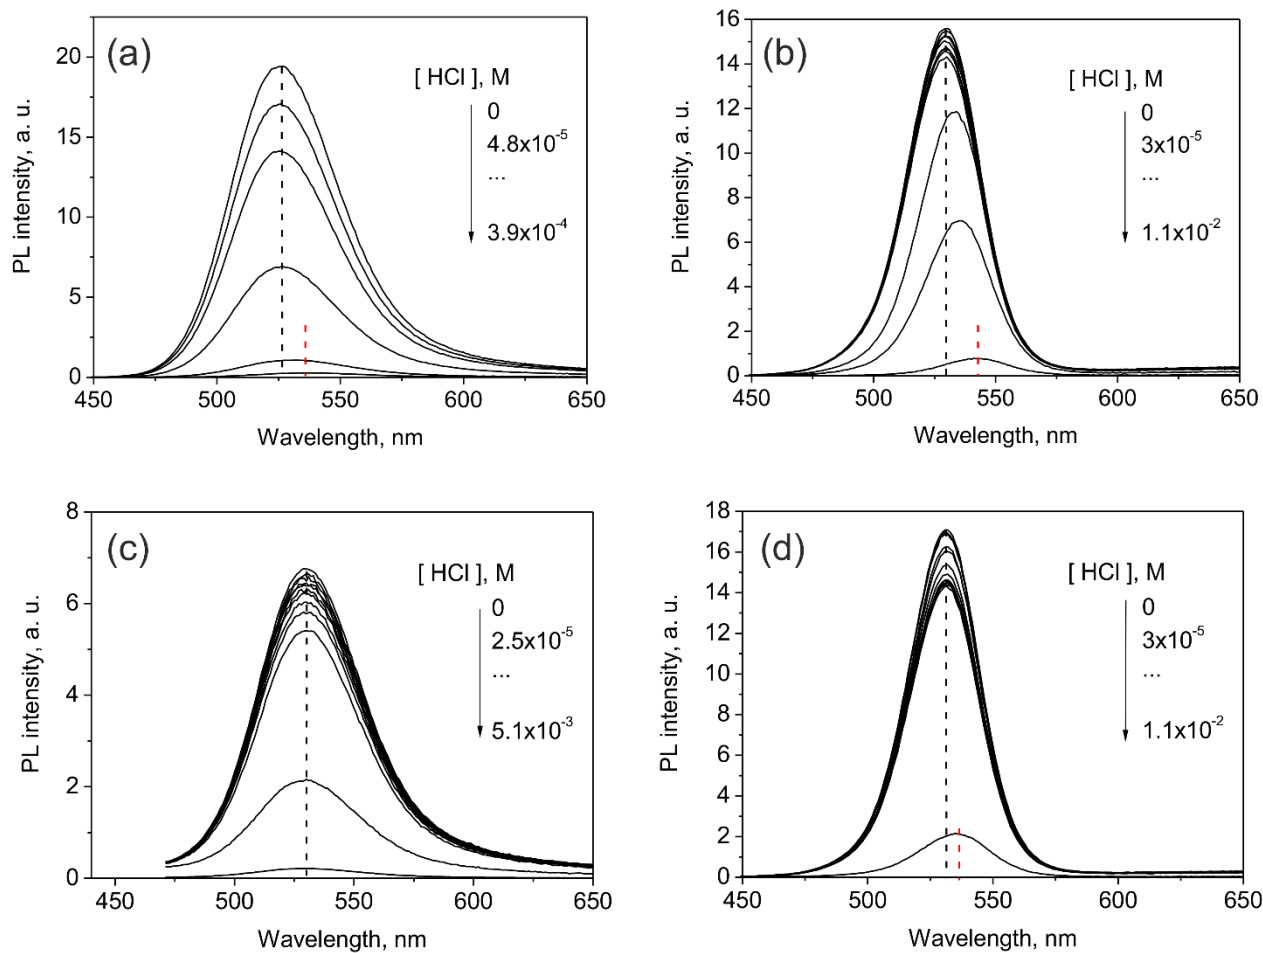

**Figure S5.** Dependences of the PL intensity on HCl concentration of water dispersed (a) CdTe ( $A=0.039$ ) and (b) CdSe/ZnS NCs ( $A=0.058$ ) and (c) CdTe ( $A=0.058$ ), (d) CdSe/ZnS ( $A=0.062$ ) NCs-containing particles. Color dashed lines show the variation range of the position of spectral maximum (red shift).

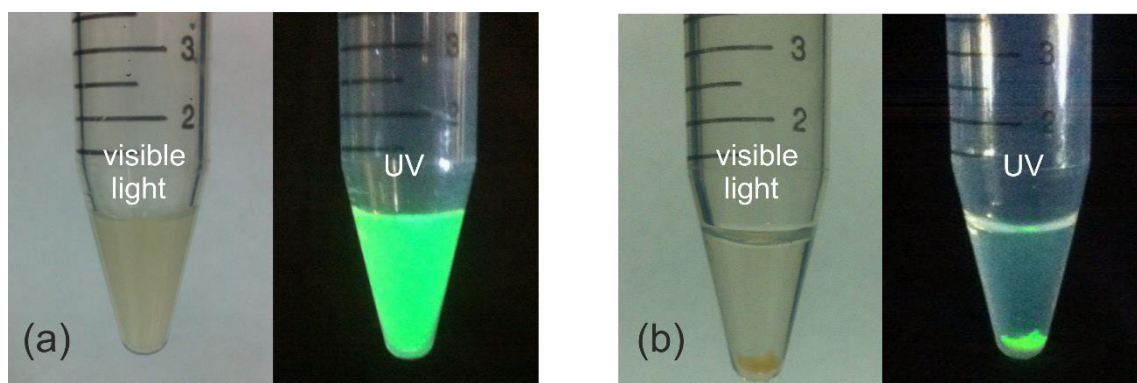

**Figure S6.** CdTe NCs-containing particles immediately after the synthesis (a) and (b) 10 days after the synthesis.
